# Supplementary material for: 100-kyr ice age cycles as a timescale matching problem
Source: Copernicus journal article supplement (doi:10.5194/esd-2024-39), 2024-12-06
Supplement: Supplementary file [file esd-2024-39-CC2-supplement.pdf]

Dear authors,

Thank you for considering my suggestions. I think that the changes you propose move us closer to a common understanding. The following is the last iteration that hopefully will incorporate our views in one statement that makes both parties comfortable.

I (almost) agree with your observation that “in terms of  $\pi$ -theorem, Eq. (8) is a piecewise linear function of  $T$ , whose discontinuous points are determined by...(here I stumble a bit)...  $\tau_{int}$ ”. Let us consider more rigorously what governs bifurcation points.

First, we should not forget that, as I have already mentioned in my first comment,  $r < 0.8$  or  $r > 1.2$  may not be potentially physically feasible for large ice sheets. Nevertheless, as a purely theoretical exercise, let us expand Eq. (7), as you say, “across different modes of resonances and non-resonances”.

$$P = \varphi(a, \zeta S_0^{1/4}, V, \varepsilon, T) \quad (7)$$

To better articulate my point, this time I choose parameters  $\varepsilon, T$  as parameters with independent dimensions, taking Eq. (7) to the following form:

$$\frac{P}{T} = \Phi\left(\frac{\varepsilon}{a}, \frac{\varepsilon T}{\zeta S_0^{1/4}}, V\right) \quad (8)$$

During a resonance mode, as we have already established,  $P \sim T$  and therefore:

$$\frac{P}{T} = \Phi\left(\frac{\varepsilon}{a}, V\right) \quad (9)$$

In a bifurcation point, the similarity parameter  $\frac{\varepsilon T}{\zeta S_0^{1/4}}$  is significant. If we note that

$$\frac{\varepsilon T}{\zeta S_0^{1/4}} = \frac{T}{\tau_{int}} \frac{\varepsilon}{a} \quad (10)$$

we will arrive to the critical statement: *VCV18 bifurcation points can be described as a timescale matching problem between orbital timescale and **orbitally modified** intrinsic timescale  $\tau_{int} \frac{a}{\varepsilon} = \frac{\zeta S_0^{1/4}}{\varepsilon}$ .*

This statement gives us the key for interpretation of Fig. 4(b). As I have already argued, the horizontal axis of it is  $\zeta$  that can be rescaled as  $\zeta S_0^{1/4}$  (these are “remains” of  $\tau_{int}$ ). The vertical axis is  $\varepsilon$ . Therefore the *slopes  $\frac{\zeta S_0^{1/4}}{\varepsilon}$  are orbitally modified intrinsic timescales* that separate nonlinear resonance tongues.
