# Supplementary material for: 100-kyr ice age cycles as a timescale matching problem
Source: Copernicus journal article supplement (doi:10.5194/esd-2024-39), 2024-12-06
Supplement: Supplementary file [file esd-2024-39-CC3-supplement.pdf]

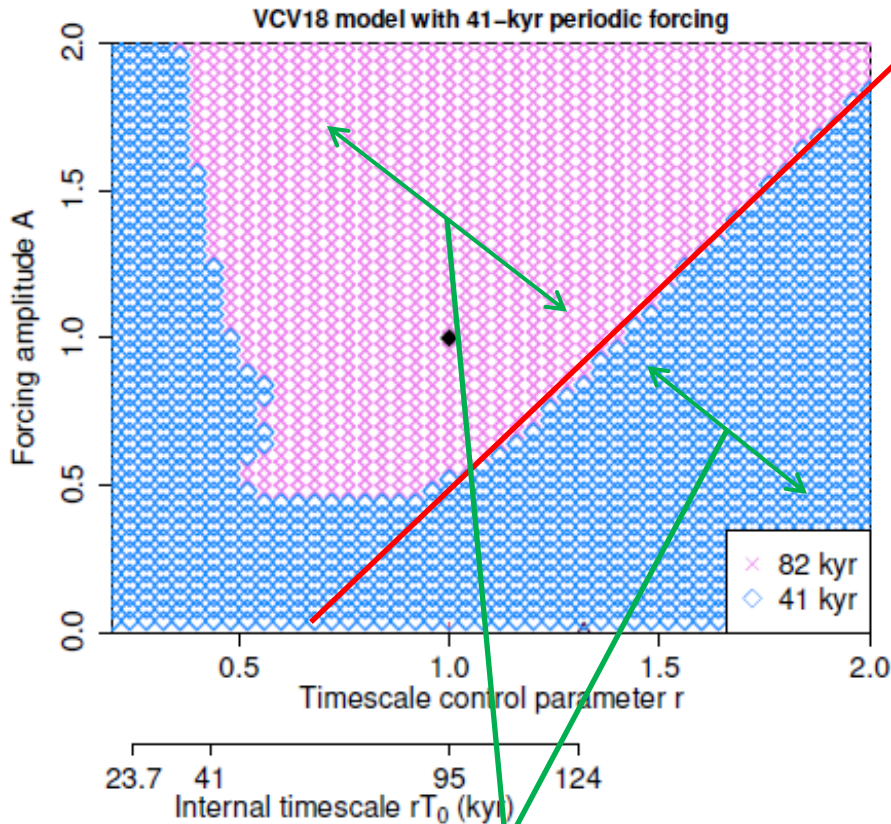

Bifurcation slope or orbitally modified  
intrinsic timescale  $\tau_{int} \frac{a}{\varepsilon} = \frac{\zeta S_0^{1/4}}{\varepsilon} = \frac{rT_0}{A}$ .

The system may bifurcate even if the  
intrinsic time scale is, for example, much  
longer than the 100-kyr eccentricity  
period (e.g.,  $r=2$ ) as long as orbital  
forcing is strong enough (e.g.,  $A=2$ ).

The system is independent on intrinsic timescale and on  
orbitally modified intrinsic timescale (slope).
